# Supplementary material for: The Transposon Registry
Source: Mob DNA. 2019 Oct 9;10:40. doi: 10.1186/s13100-019-0182-3 (PMC6785933; doi:10.1186/s13100-019-0182-3)
Supplement: Supplementary file 2 — Additional file 2: Table S2. List of transposons associated with antibiotic resistance genes (DOCX 24 kb) [file 13100_2019_182_MOESM2_ESM.docx]

**Additional file 2: Table S2 List of transposons associated with antibiotic resistance genes**

| Antibiotic classes | Tn records |
| --- | --- |
| Aminoglycoside | Tn*4*,Tn*5*,Tn*6*,Tn*7*,Tn*21*,Tn*55*,Tn*71*,Tn*72*,Tn*76*,Tn*510*,Tn*511*,Tn*536*,Tn*554*,Tn*601*,Tn*602*,Tn*611*,Tn*654*,Tn*679*,Tn*732*,Tn*733*,Tn*734*,Tn*800*,Tn*813*,Tn*903*,Tn*904*,Tn*924*,Tn*1331*,Tn*1332*,Tn*1401*,Tn*1402*,Tn*1403*,Tn*1404*,Tn*1405*,Tn*1525*,Tn*1527*,Tn*1528*,Tn*1545*,Tn*1548*,Tn*1696*,Tn*1699*,Tn*1700*,Tn*1723*,Tn*1732*,Tn*1755*,Tn*1792*,Tn*1824*,Tn*1825*,Tn*1831*,Tn*1935*,Tn*2000*,Tn*2011*,Tn*2101*,Tn*2350*,Tn*2353*,Tn*2401*,Tn*2411*,Tn*2424*,Tn*2425*,Tn*2426*,Tn*2507*,Tn*2515*,Tn*2521*,Tn*2523*,Tn*2603*,Tn*2607*,Tn*2608*,Tn*2610*,Tn*2670*,Tn*2671*,Tn*2672*,Tn*2680*,Tn*2681*,Tn*2922*,Tn*3613*,Tn*3706*,Tn*3851*,Tn*3853*,Tn*3854*,Tn*4000*,Tn*4001*,Tn*4031*,Tn*4352*,Tn*4411*,Tn*4527*,Tn*4551*,Tn*5045*,Tn*5062*,Tn*5096*,Tn*5097*,Tn*5098*,Tn*5099*,Tn*5384*,Tn*5385*,Tn*5393*,Tn*5404*,Tn*5405*,Tn*5466*,Tn*5495*,Tn*5531*,Tn*6001*,Tn*6003*,Tn*6004*,Tn*6016*,Tn*6017*,Tn*6020*,Tn*6023*,Tn*6026*,Tn*6027*,Tn*6028*,Tn*6029*,Tn*6031*,Tn*6060*,Tn*6061*,Tn*6072*,Tn*6082*,Tn*6088*,Tn*6108*,Tn*6133*,Tn*6162*,Tn*6163*,Tn*6164*,Tn*6166*,Tn*6167*,Tn*6172*,Tn*6178*,Tn*6179*,Tn*6180*,Tn*6183*,Tn*6187*,Tn*6203*,Tn*6204*,Tn*6205*,Tn*6207*,Tn*6210*,Tn*6214*,Tn*6216*,Tn*6217*,Tn*6218*,Tn*6229*,Tn*6234*,Tn*6235*,Tn*6238*,Tn*6242*,Tn*6249*,Tn*6250*,Tn*6263*,Tn*6279*,Tn*6284*,Tn*6285*,Tn*6286*,Tn*6293*,Tn*6297*,Tn*6299*,Tn*6301*,Tn*6308*,Tn*6321*,Tn*6331*,Tn*6338*,Tn*6340*,Tn*6345*,Tn*6352*,Tn*6356*,Tn*6363*,Tn*6375*,Tn*6378*,Tn*6382*,Tn*6383*,Tn*6384*,Tn*6392*,Tn*6393*,Tn*6394*,Tn*6397*,Tn*6400*,Tn*6401*,Tn*6402*,Tn*6403*,Tn*6404*,Tn*6411*,Tn*6413*,Tn*6414*,Tn*6417*,Tn*6431*,Tn*6450*,Tn*6451*,Tn*6505*,Tn*6530*,Tn*6531*,Tn*6532*,Tn*6533*,Tn*6534*,Tn*6540*,Tn*6649*,Tn*6674* |
| Amphenicol | Tn*45*,Tn*9*,Tn*558*,Tn*981*,Tn*1403*,Tn*1696*,Tn*1725*,Tn*2000*,Tn*2001*,Tn*2424*,Tn*2426*,Tn*2506*,Tn*2507*,Tn*2516*,Tn*2653*,Tn*2670*,Tn*2671*,Tn*2672*,Tn*2700*,Tn*3351*,Tn*3352*,Tn*3951*,Tn*4451*,Tn*4452*,Tn*5252*,Tn*5253*,Tn*5564*,Tn*6027*,Tn*6058*,Tn*6060*,Tn*6061*,Tn*6088*,Tn*6089*,Tn*6180*,Tn*6187*,Tn*6214*,Tn*6217*,Tn*6218*,Tn*6229*,Tn*6246*,Tn*6248*,Tn*6249*,Tn*6261*,Tn*6279*,Tn*6284*,Tn*6285*,Tn*6286*,Tn*6297*,Tn*6299*,Tn*6301*,Tn*6308*,Tn*6383*,Tn*6384*,Tn*6393*,Tn*6400*,Tn*6401*,Tn*6410*,Tn*6431*,Tn*6450*,Tn*6451*,Tn*6530*,Tn*6531*,Tn*6533*,Tn*6534*,Tn*6644*,Tn*6674* |
| Anthracycline | Tn*6097* |
| β-lactam | Tn*1*,Tn*2*,Tn*3*,Tn*125*,Tn*552*,Tn*654*,Tn*801*,Tn*802*,Tn*841*,Tn*901*,Tn*902*, Tn*1213,* Tn*1331*,Tn*1332*,Tn*1401*,Tn*1402*,Tn*1405*,Tn*1699*,Tn*1700*,Tn*1701*,Tn*1755*,Tn*1756*,Tn*1935*,Tn*1999*,Tn*2000*,Tn*2003*,Tn*2006*,Tn*2007*,Tn*2008*,Tn*2011*,Tn*2016*,Tn*2101*,Tn*2301*,Tn*2410*,Tn*2521*,Tn*2601*,Tn*2602*,Tn*2603*,Tn*2607*,Tn*2610*,Tn*2660*,Tn*2922*,Tn*3000*,Tn*3651*,Tn*4002*,Tn*4176*,Tn*4201*,Tn*4291*,Tn*4401*,Tn*4555*,Tn*5385*,Tn*5386*,Tn*5431*,Tn*6001*,Tn*6004*,Tn*6013*,Tn*6016*,Tn*6017*,Tn*6026*,Tn*6027*,Tn*6029*,Tn*6045*,Tn*6060*,Tn*6061*,Tn*6080*,Tn*6088*,Tn*6092*,Tn*6093*,Tn*6108*,Tn*6113*,Tn*6114*,Tn*6163*,Tn*6167*,Tn*6168*,Tn*6181*,Tn*6186*,Tn*6187*,Tn*6191*,Tn*6203*,Tn*6206*,Tn*6214*,Tn*6216*,Tn*6217*,Tn*6222*,Tn*6234*,Tn*6237*,Tn*6238*,Tn*6240*,Tn*6242*,Tn*6249*,Tn*6252*,Tn*6255*,Tn*6256*,Tn*6284*,Tn*6296*,Tn*6297*,Tn*6306*,Tn*6308*,Tn*6320*,Tn*6329*,Tn*6338*,Tn*6339*,Tn*6345*,Tn*6352*,Tn*6356*,Tn*6360*,Tn*6361*,Tn*6367*,Tn*6375*,Tn*6377*,Tn*6378*,Tn*6382*,Tn*6383*,Tn*6384*,Tn*6391*,Tn*6392*,Tn*6394*,Tn*6397*,Tn*6400*,Tn*6401*,Tn*6403*,Tn*6404*,Tn*6411*,Tn*6413*,Tn*6414*,Tn*6435*,Tn*6450*,Tn*6451*,Tn*6501*,Tn*6505*,Tn*6530*,Tn*6531*,Tn*6533*,Tn*6534*,Tn*6540*,Tn*6649*,Tn*6652*,Tn*6655*,Tn*6656* |
| Colistin | Tn*6330*,Tn*6390*,Tn*6452*,Tn*6518* |
| Fosfomycin | Tn*2921*, Tn*6001* |
| Glycopeptide | Tn*5*,Tn*1546*,Tn*1547*,Tn*1549*,Tn*5382*,Tn*6074*,Tn*6083*,Tn*6202* |
| Lincomycin | Tn*917*,Tn*1545*,Tn*3853*,Tn*4551*,Tn*5030*,Tn*5432*,Tn*6133*,Tn*6260*,Tn*6450*,Tn*6451*,Tn*6644* |
| Macrolide | Tn*551*,Tn*554*,Tn*917*,Tn*950*,Tn*1116*,Tn*1207.1*,Tn*1545*,Tn*1806*,Tn*2009*,Tn*2010*,Tn*2017*,Tn*3701*,Tn*3703*,Tn*3704*,Tn*3705*,Tn*3853*,Tn*3871*,Tn*3872*,Tn*3951*,Tn*4351*,Tn*4400*,Tn*4551*,Tn*5384*,Tn*5385*,Tn*5432*,Tn*5466*,Tn*5506*,Tn*6002*,Tn*6003*,Tn*6058*,Tn*6079*,Tn*6164*,Tn*6183*,Tn*6194*,Tn*6215*,Tn*6218*,Tn*6242*,Tn*6261*,Tn*6263*,Tn*6279*,Tn*6284*,Tn*6285*,Tn*6295*,Tn*6297*,Tn*6308*,Tn*6331*,Tn*6378*,Tn*6383*,Tn*6393*,Tn*6397*,Tn*6403*,Tn*6413*,Tn*6450*,Tn*6644*,Tn*6651* |
| Nitroimidazole | Tn*6456* |
| Nucleoside antibiotic | Tn*6383*, Tn*6411* |
| Oxazolidinone | Tn*6261*,Tn*6628*,Tn*6644*,Tn*6674* |
| Pleuromutilin | Tn*6133*, Tn*6644* |
| Quinolone | Tn*2012*,Tn*6010*,Tn*6074*,Tn*6083*,Tn*6218*,Tn*6238*,Tn*6286*,Tn*6292*,Tn*6297*,Tn*6308*,Tn*6325*,Tn*6338*,Tn*6340*,Tn*6360*,Tn*6361*,Tn*6384*,Tn*6393*,Tn*6400*,Tn*6450* |
| Rifamycins | Tn*6061*,Tn*6229*,Tn*6284*,Tn*6308*,Tn*6338*,Tn*6340*,Tn*6384*,Tn*6400*,Tn*6401*,Tn*6450*,Tn*6451* |
| Streptogramin | Tn*1545*,Tn*5406*,Tn*5432*,Tn*6133*,Tn*6218*,Tn*6644* |
| Streptothricin | Tn*1825*,Tn*1826*,Tn*2425*,Tn*6003*,Tn*6031*,Tn*6181*,Tn*6451* |
| Sulphonamide | Tn*4*,Tn*21*,Tn*536*,Tn*610*,Tn*800*,Tn*813*,Tn*1401*,Tn*1402*,Tn*1404*,Tn*1405*,Tn*1548*,Tn*1696*,Tn*1935*,Tn*2000*,Tn*2011*,Tn*2101*,Tn*2353*,Tn*2410*,Tn*2411*,Tn*2425*,Tn*2426*,Tn*2521*,Tn*2603*,Tn*2607*,Tn*2608*,Tn*2610*,Tn*2670*,Tn*2671*,Tn*2672*,Tn*3613*,Tn*4000*,Tn*5045*,Tn*5086*,Tn*6001*,Tn*6025*,Tn*6026*,Tn*6027*,Tn*6029*,Tn*6060*,Tn*6061*,Tn*6088*,Tn*6108*,Tn*6167*,Tn*6172*,Tn*6180*,Tn*6187*,Tn*6203*,Tn*6208*,Tn*6209*,Tn*6214*,Tn*6216*,Tn*6217*,Tn*6234*,Tn*6242*,Tn*6249*,Tn*6250*,Tn*6279*,Tn*6284*,Tn*6286*,Tn*6297*,Tn*6299*,Tn*6300*,Tn*6301*,Tn*6302*,Tn*6321*,Tn*6325*,Tn*6326*,Tn*6338*,Tn*6383*,Tn*6384*,Tn*6391*,Tn*6393*,Tn*6400*,Tn*6401*,Tn*6403*,Tn*6413*,Tn*6414*,Tn*6417*,Tn*6431*,Tn*6432*,Tn*6450*,Tn*6530*,Tn*6531*,Tn*6532*,Tn*6533*,Tn*6534*,Tn*6649* |
| Tetracycline | Tn*10*,Tn*701*,Tn*804*,Tn*916*,Tn*918*,Tn*919*,Tn*925*,Tn*1021*,Tn*1022*,Tn*1404*,Tn*1523*,Tn*1545*,Tn*1720*,Tn*1721*,Tn*1756*,Tn*1771*,Tn*1822*,Tn*2009*,Tn*2010*,Tn*2017*,Tn*2440*,Tn*2515*,Tn*2516*,Tn*2653*,Tn*2657*,Tn*3701*,Tn*3702*,Tn*3703*,Tn*3704*,Tn*3705*,Tn*3707*,Tn*3872*,Tn*3951*,Tn*4351*,Tn*4400*,Tn*4431*,Tn*4731*,Tn*5030*,Tn*5031*,Tn*5032*,Tn*5033*,Tn*5251*,Tn*5253*,Tn*5381*,Tn*5383*,Tn*5385*,Tn*5397*,Tn*5431*,Tn*5491*,Tn*5706*,Tn*5801*,Tn*6000*,Tn*6002*,Tn*6003*,Tn*6009*,Tn*6014*,Tn*6031*,Tn*6058*,Tn*6061*,Tn*6079*,Tn*6084*,Tn*6085*,Tn*6086*,Tn*6087*,Tn*6088*,Tn*6099*,Tn*6100*,Tn*6108*,Tn*6164*,Tn*6166*,Tn*6167*,Tn*6183*,Tn*6190*,Tn*6194*,Tn*6198*,Tn*6207*,Tn*6224*,Tn*6227*,Tn*6247*,Tn*6248*,Tn*6253*,Tn*6297*,Tn*6298*,Tn*6299*,Tn*6300*,Tn*6301*,Tn*6302*,Tn*6303*,Tn*6308*,Tn*6309*,Tn*6432*,Tn*6530*,Tn*6531*,Tn*6533*,Tn*6534*,Tn*6539*,Tn*6648*,Tn*6649* |
| Thiopeptide | Tn*5492*, Tn*5493* |
| Trimethoprim | Tn*7*,Tn*71*,Tn*72*,Tn*735*,Tn*76*,Tn*813*,Tn*1527*,Tn*1548*,Tn*1824*,Tn*4003*,Tn*4132*,Tn*4527*,Tn*5086*,Tn*5090*,Tn*536*,Tn*559*,Tn*6025*,Tn*6026*,Tn*6027*,Tn*6028*,Tn*6088*,Tn*6181*,Tn*6198*,Tn*6222*,Tn*6242*,Tn*6286*,Tn*6297*,Tn*6325*,Tn*6338*,Tn*6402*,Tn*6414*,Tn*6450*,Tn*6451*,Tn*6540*,Tn*6649* |
| Tuberactinomycin | Tn*4560*, Tn*4563* |
